# Supplementary material for: Development of a Sensitive Self-Powered Glucose Biosensor Based on an Enzymatic Biofuel Cell
Source: PubMed Central journal article supplement (PMC7825672; doi:10.3390/bios11010016), 2021-01-07
Supplement: biosensors-11-00016-s001.pdf [file biosensors-11-00016-s001.pdf]

## SUPPORTING INFORMATION

# Development of a Sensitive Self-Powered Glucose Biosensor based on an Enzymatic Biofuel Cell

**Kantapat Chansaenpak**<sup>1</sup>, **Anyanee Kamkaew**<sup>2</sup>, **Sireerat Lisnund**<sup>3</sup>, **Pannaporn Prachai**<sup>4</sup>,

**Patipat Ratwirunkit**<sup>4</sup>, **Thitichaya Jingpho**<sup>4</sup>, **Vincent Blay**<sup>5,\*</sup> and **Piyanut Pinyou**<sup>2,\*</sup>

<sup>1</sup> National Nanotechnology Center, National Science and Technology Development Agency, Thailand Science Park, Pathum Thani 12120, Thailand.

<sup>2</sup> School of Chemistry, Institute of Science, Suranaree University of Technology, 111 University Avenue, Suranaree, Muang, Nakhon Ratchasima 30000, Thailand.

<sup>3</sup> Department of Applied Chemistry, Faculty of Science and Liberal Arts, Rajamangala University of Technology Isan, 744, Suranarai Rd., Nakhon Ratchasima 30000, Thailand.

<sup>4</sup> SCiUS, Suranaree University of Technology, 111 University Avenue, Suranaree, Muang, Nakhon Ratchasima 30000, Thailand.

<sup>5</sup> Division of Biomaterials and Bioengineering, University of California San Francisco, 513 Parnassus Ave, San Francisco, CA 94143, USA.

\* Correspondence: piyanutp@sut.ac.th (P.P.), vincent.blayroger@ucsf.edu (V.B.)

**Table S1.** Comparison of the performance of previously developed enzymatic biofuel cells or hybrid enzymatic biofuel cells for self-powered glucose sensing.

| Electrode                                                                                     | Catalyst (Anode/Cathode) | Fuel    | Oxidant                       | Operating conditions                                                    | $P_{max}$ ( $\mu W cm^{-2}$ ) | OCV (V) | Dynamic range (mM) | Ref.      |
|-----------------------------------------------------------------------------------------------|--------------------------|---------|-------------------------------|-------------------------------------------------------------------------|-------------------------------|---------|--------------------|-----------|
| Anode: Pt-Ir wire<br>Cathode : carbon cloth                                                   | NAD-GDH/BOD              | Glucose | O <sub>2</sub>                | 0.1 M phosphate buffer<br>pH 7.0, 10 mM glucose<br>Air-saturated buffer | 11.8                          | 0.43    | 1 - 10             | [1]       |
| Anode: TTF-CF<br>Cathode: CF<br>(microneedle electrodes)                                      | GOx/Pt-Rh alloy          | Glucose | O <sub>2</sub>                | 0.1 M phosphate buffer<br>pH 7.4, 80 mM glucose<br>Air-saturated buffer | 170                           | 0.38    | 10 - 80            | [2]       |
| Anode: TTF-PCI<br>Cathode: PCI<br>(screen printed electrode array )                           | GOx/BOD                  | Glucose | O <sub>2</sub>                | 1 M phosphate buffer<br>pH 7 , 100 mM glucose<br>Air-saturated buffer   | 120                           | 0.57    | 1 - 25             | [3]       |
| Anode: MWCNTs-ink<br>Cathode: Ag <sub>2</sub> O/Ag<br>(stretchable textile-based electrodes ) | GOx/-                    | Glucose | -                             | 0.1 M PBS buffer pH 7,<br>50 mM glucose                                 | 160                           | 0.44    | 0 - 50             | [4]       |
| Anode: CoPc/PBA/Buckypaper<br>Cathode: PBA/Buckypaper                                         | GOx/MnO <sub>2</sub>     | Glucose | -                             | 0.1 M PBS buffer pH 7,<br>20 mM glucose                                 | 136                           | 0.65    | 0.5 - 8            | [5]       |
| PBSE/Buckypaper based on<br>MWCNTs                                                            | PQQ-GDH/laccase          | Glucose | O <sub>2</sub>                | 0.1 M phosphate buffer<br>pH 6.0, 45 mM glucose<br>Air-saturated buffer | 67.86                         | 0.682   | 0.5 - 35           | [6]       |
| Anode: rGO/poly(TBO) Cathode :<br>PBSE/MWCNTs                                                 | NAD-GDH/<br>GOx-HRP      | Glucose | H <sub>2</sub> O <sub>2</sub> | 0.1 M phosphate buffer<br>pH 7.4, 40 mM glucose<br>Air-saturated buffer | 31.3                          | 0.65    | 0.1 – 7.0          | This work |

CF = carbon fibers; TTF = tetrathiafulvalene; PCI Porous carbon ink; GOx = glucose oxidase; GDH = glucose dehydrogenase; HRP = horseradish peroxidase; BOD = bilirubin oxidase  
TBO = toluidine blue; MWCNTs = multi-walled carbon nanotubes; CoPc = cobalt phthalocyanine; PBA = pyrenebutyric acid; PBS = Phosphate buffered saline;  
PBSE = 1-pyrenebutyric acid *N*-hydroxysuccinimide ester.

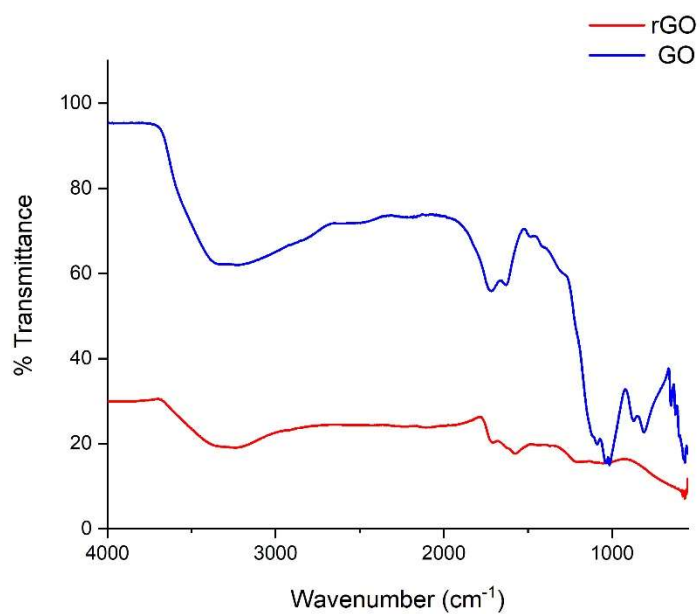

**Figure S1.** IR spectra for rGO and GO.

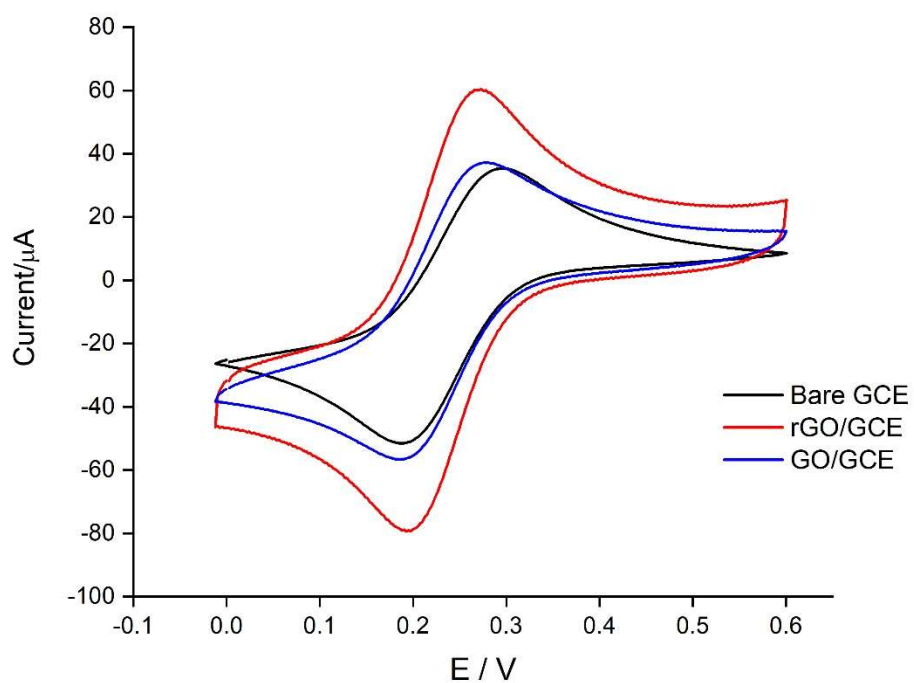

**Figure S2.** Cyclic voltammograms of the modified electrodes in the solution of 5 mM  $\text{Fe}(\text{CN})_6^{3+}$  containing 0.1 M KCl at the scan rate of 50 mV/s.

**Table S2.** Comparison of the Michaelis-Menten parameters, including  $K_m$  and  $J_{max}$ , for the results in Figure 3.

| GDH amount<br>( $\mu\text{g}$ ) | $K_m$<br>(mM) | $J_{max}$<br>( $\mu\text{A cm}^{-2}$ ) | $J_{max}/K_m$<br>( $\mu\text{A mM}^{-1} \text{cm}^{-2}$ ) |
|---------------------------------|---------------|----------------------------------------|-----------------------------------------------------------|
| 5                               | 5.6           | 79.1                                   | 14.1                                                      |
| 10                              | 7.1           | 123.7                                  | 17.4                                                      |
| 15                              | 11.9          | 101.9                                  | 8.6                                                       |

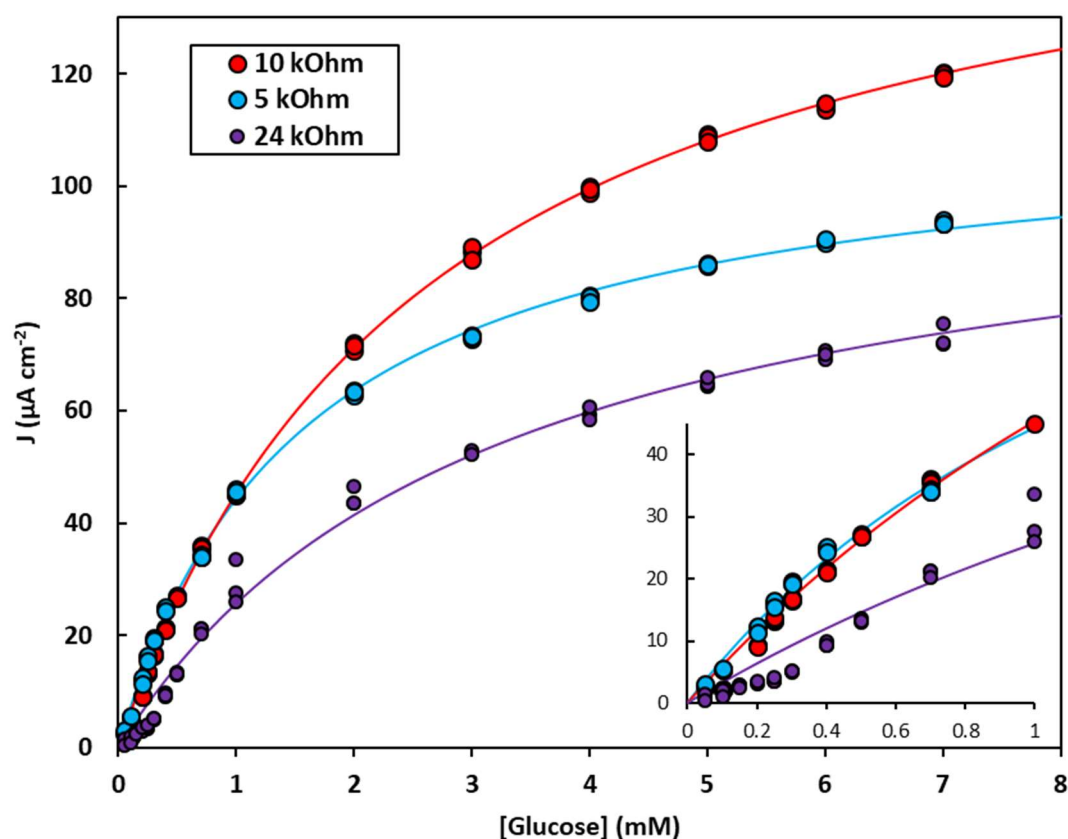

| Resistance (k $\Omega$ ) | $K_m$ (mM)        | $J_{max}$ ( $\mu\text{A cm}^{-2}$ ) | $R^2$  |
|--------------------------|-------------------|-------------------------------------|--------|
| 5                        | $1.547 \pm 0.030$ | $112.8 \pm 0.8$                     | 0.9989 |
| 10                       | $2.666 \pm 0.059$ | $165.9 \pm 1.6$                     | 0.9991 |
| 24                       | $3.191 \pm 0.225$ | $107.5 \pm 3.4$                     | 0.9951 |

**Figure S3.** Calibration curve for the self-powered detection of glucose ( $n = 3$ ) in a membrane-less cell configuration, using the optimized electrodes and different resistor settings. The calibration curve can be well described using a Michaelis-Menten law and used across a broad concentration range (A), with the parameters indicated in the table.

## References

1. Huang, S.-H.; Chen, W.-H.; Lin, Y.-C. A Self-Powered Glucose Biosensor Operated Underwater to Monitor Physiological Status of Free-Swimming Fish. *Energies* 2019, 12, 1827.
2. Valdés-Ramírez, G.; Li, Y.-C.; Kim, J.; Jia, W.; Bandodkar, A.J.; Nuñez-Flores, R.; Miller, P.R.; Wu, S.-Y.; Narayan, R.; Windmiller, J.R., et al. Microneedle-based self-powered glucose sensor. *Electrochemistry Communications* 2014, 47, 58-62, doi:10.1016/j.elecom.2014.07.014.
3. Shitanda, I.; Fujimura, Y.; Nohara, S.; Hoshi, Y.; Itagaki, M.; Tsujimura, S. Paper-Based Disk-Type Self-Powered Glucose Biosensor Based on Screen-Printed Biofuel Cell Array. *Journal of The Electrochemical Society* 2019, 166, B1063-B1068, doi:10.1149/2.1501912jes.
4. Jeerapan, I.; Sempionatto, J.R.; Pavinatto, A.; You, J.-M.; Wang, J. Stretchable biofuel cells as wearable textile-based self-powered sensors. *Journal of Materials Chemistry A* 2016, 4, 18342-18353, doi:10.1039/C6TA08358G.
5. Hao, S.; Zhang, H.; Sun, X.; Zhai, J.; Dong, S. A mediator-free self-powered glucose biosensor based on a hybrid glucose/MnO<sub>2</sub> enzymatic biofuel cell. *Nano Research* 2021, 14, 707-714, doi:10.1007/s12274-020-3101-5.
6. Slaughter, G.; Kulkarni, T. A self-powered glucose biosensing system. *Biosensors and Bioelectronics* 2016, 78, 45-50, doi:10.1016/j.bios.2015.11.022.
